# Supplementary material
Source: PubMed Central journal article supplement (PMC3190060)
Supplement: NIHMS312743-supplement-Supp_Table_S1.pdf [file NIHMS312743-supplement-Supp_Table_S1.pdf]

**Supplemental Table 1. Control groups for ECT testing<sup>a</sup>****Females**

| <u>Celf4 allele; cre</u> | <u>Pvalb-Cre</u> | <u>Viaat-Cre</u> | <u>Emx1-Cre</u> | <u>Camk2a-Cre</u> | <u>EIIA-Cre</u> | <u>ER-Cre<sup>b</sup></u> |
|--------------------------|------------------|------------------|-----------------|-------------------|-----------------|---------------------------|
| +/+; cre+                | 2                | 6                | 10              | 8                 | 8               | 6                         |
| +/+; cre-                | 1                | 7                | 6               | 3                 | 10              | 2                         |
| flox/+; cre-             | 7                | 5                | 5               | 1                 | 1               | 7                         |
| flox/flox; cre-          | 4                | 0                | 0               | 0                 | 0               | 4                         |
| Total number of mice     | 14               | 18               | 21              | 12                | 19              | 19                        |

**Males**

| <u>Celf4 allele; cre</u> | <u>Pvalb-Cre</u> | <u>Viaat-Cre</u> | <u>Emx1-Cre</u> | <u>Camk2a-Cre</u> | <u>EIIA-Cre</u> | <u>ER-Cre</u> |
|--------------------------|------------------|------------------|-----------------|-------------------|-----------------|---------------|
| +/+; cre+                | 3                | 4                | 4               | 8                 | 4               | 6             |
| +/+; cre-                | 0                | 4                | 4               | 5                 | 6               | 0             |
| flox/+; cre-             | 9                | 6                | 7               | 7                 | 1               | 11            |
| flox/flox; cre-          | 3                | 0                | 2               | 0                 | 0               | 4             |
| Total number of mice     | 15               | 14               | 17              | 20                | 11              | 21            |

<sup>a</sup>Genotypes of mice comprising the control groups for each experimental cre+ group are shown, and the total number of control mice per group is given. <sup>b</sup>All of the control mice for the ER-Cre group were tamoxifen-treated.
