# Supplementary material
Source: PubMed Central journal article supplement (PMC3190060)

wake

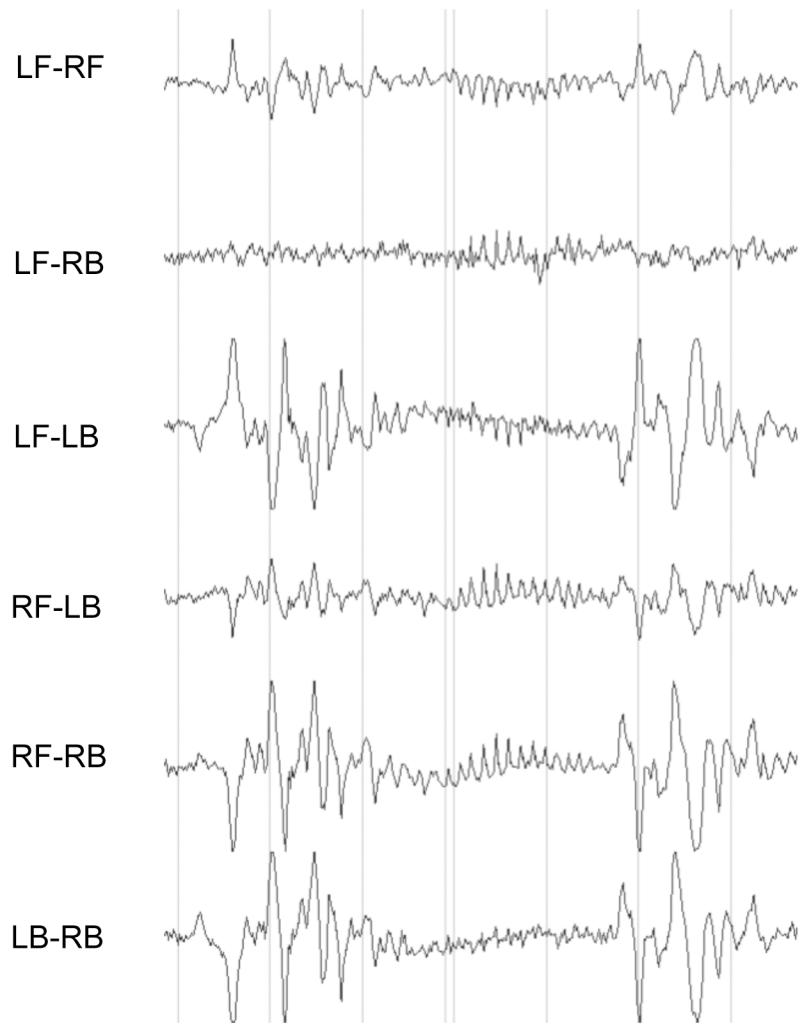

quiet wake

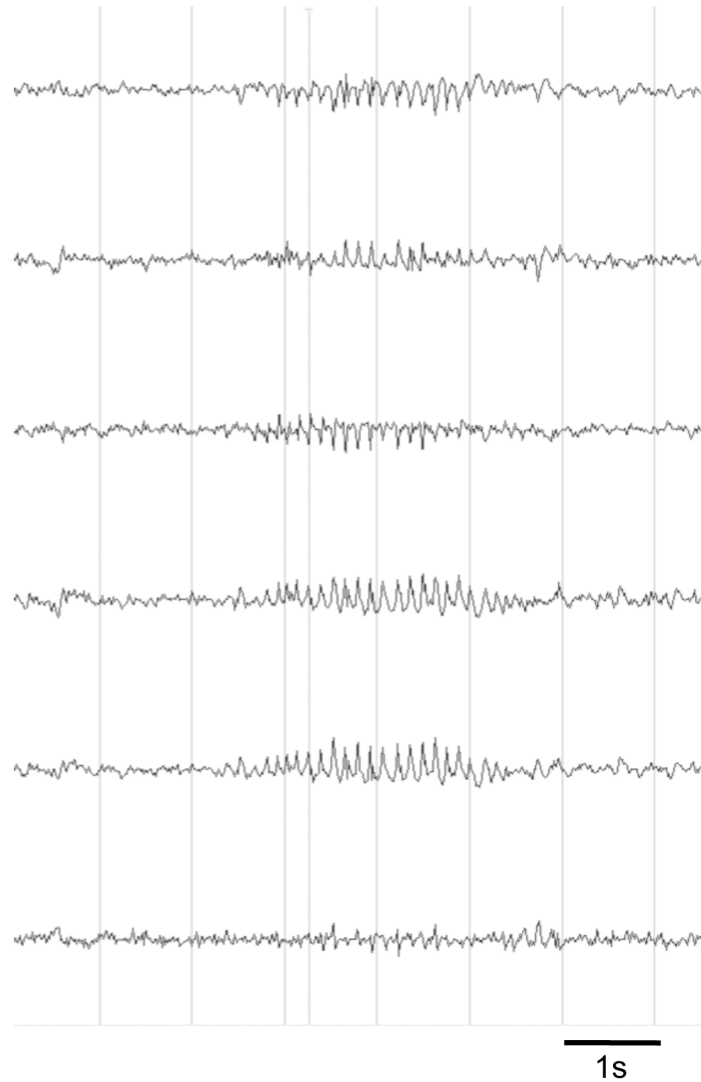

Supplement: NIHMS312743-supplement-Supp_Figure_S1.pdf [file NIHMS312743-supplement-Supp_Figure_S1.pdf]
